# Supplementary material for: Diversity of Zoanthids (Anthozoa: Hexacorallia) on Hawaiian Seamounts: Description of the Hawaiian Gold Coral and Additional Zoanthids
Source: PLOS journal article supplement (doi:10.1371/journal.pone.0052607), 2013-01-09

Figure S1

ML phylogenetic tree reconstructed using the partial 16S sequences. The position of *Isozoanthus giganteus* near *Epizoanthus* is well supported. ML bootstrap values are indicated at the nodes. Only the groups supported by 50% or more bootstrap are represented. Microzoanthidae are used as outgroup.

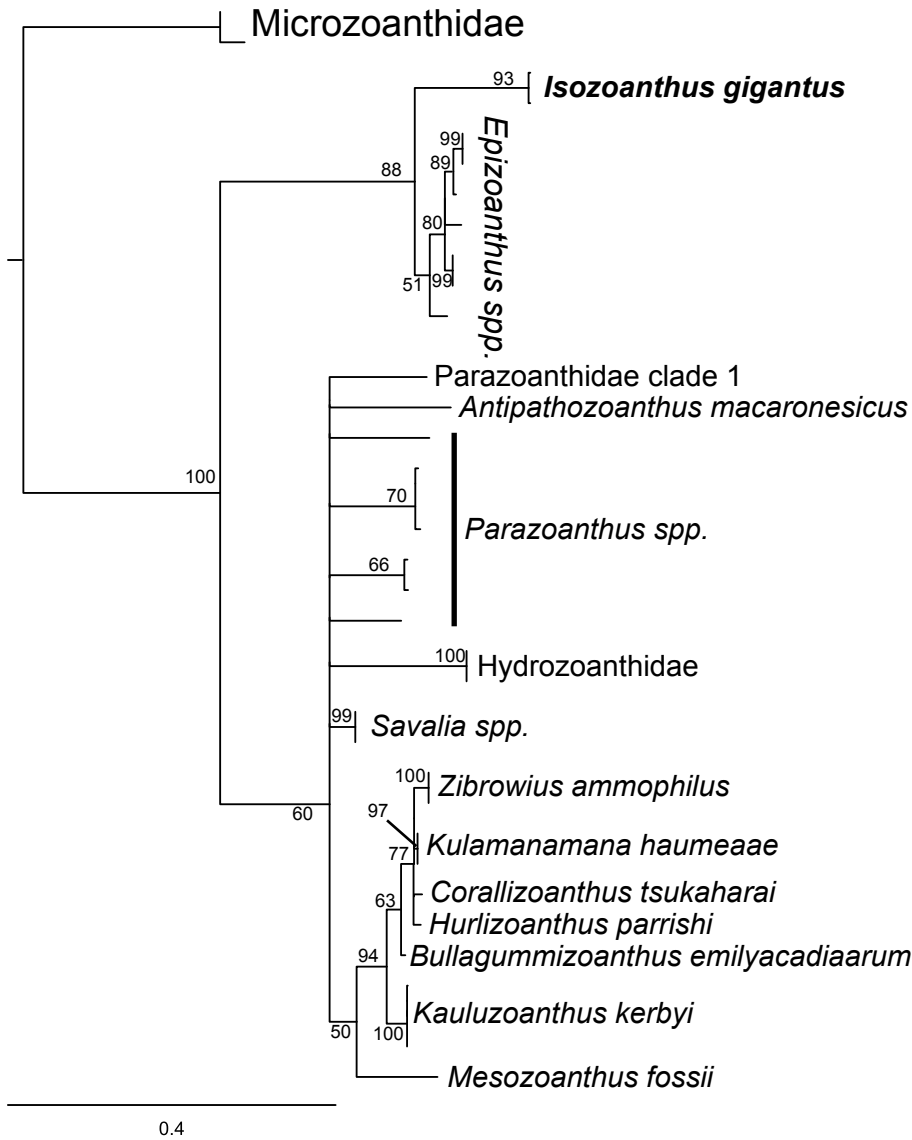

Supplement: S2 (10.1371/journal.pone.0052607.s002) [file journal.pone.0052607.s002]
